# Supplementary material for: Association of variability of blood pressure and glycemic with the risk of mortality and severe consciousness disturbance among critically ill patients with ischemic stroke, subarachnoid hemorrhage, and intracerebral hemorrhage: a retrospective cohort study from MIMIC-IV database
Source: Research Square preprint supplement (doi:10.21203/rs.3.rs-6772731/v1), 2025-06-25
Supplement: Supplementary file 1 [file 3ad196b746ef86ad441e621c.docx]

Table S1 Sensitivity analysis before and after interpolation of missing data

| Variables | After imputation | Before imputation | Statistics | *P* |
| --- | --- | --- | --- | --- |
| Weight, kg, Mean ± SD | 81.06 ± 22.28 | 81.07 ± 22.30 | t=-0.02 | 0.986 |

SD, standard deviation.

Table S2 Univariates analysis results

| Variables | In-hospital death | | 1-year mortality | | Severe consciousness disturbance | |
| --- | --- | --- | --- | --- | --- | --- |
| HR (95%CI) | *P* | HR (95%CI) | *P* | OR (95%CI) | *P* |
| Age | 1.01 (1.00-1.02) | 0.056 | 1.01 (1.01-1.02) | <0.001 | 0.99 (0.98-0.99) | 0.001 |
| Gender |  |  |  |  |  |  |
| Female | Ref |  | Ref |  | Ref |  |
| Male | 0.83 (0.67-1.04) | 0.106 | 0.83 (0.70-0.98) | 0.030 | 0.98 (0.78-1.22) | 0.833 |
| Race |  |  |  |  |  |  |
| White | Ref |  | Ref |  | Ref |  |
| Black | 1.27 (0.86-1.89) | 0.236 | 1.57 (1.17-2.10) | 0.003 | 1.59 (1.05-2.41) | 0.028 |
| Other | 1.95 (1.54-2.46) | <0.001 | 1.71 (1.42-2.05) | <0.001 | 1.46 (1.15-1.86) | 0.002 |
| Weight | 1.00 (0.99-1.00) | 0.094 | 0.99 (0.99-0.99) | 0.018 | 1.00 (1.00-1.01) | 0.753 |
| Smoking status |  |  |  |  |  |  |
| No | Ref |  | Ref |  | Ref |  |
| Yes | 1.00 (0.68-1.46) | 0.984 | 1.30 (1.00-1.71) | 0.053 | 0.81 (0.54-1.24) | 0.336 |
| Diabetes |  |  |  |  |  |  |
| No | Ref |  | Ref |  | Ref |  |
| Yes | 0.85 (0.67-1.07) | 0.169 | 0.95 (0.79-1.13) | 0.555 | 0.76 (0.60-0.96) | 0.024 |
| Congestive heart failure |  |  |  |  |  |  |
| No | Ref |  | Ref |  | Ref |  |
| Yes | 1.04 (0.83-1.31) | 0.727 | 1.24 (1.04-1.49) | 0.017 | 1.03 (0.80-1.31) | 0.840 |
| Hypertension |  |  |  |  |  |  |
| No | Ref |  | Ref |  | Ref |  |
| Yes | 0.96 (0.77-1.19) | 0.701 | 0.76 (0.64-0.90) | 0.001 | 0.97 (0.78-1.21) | 0.778 |
| Sepsis |  |  |  |  |  |  |
| No | Ref |  | Ref |  | Ref |  |
| Yes | 1.24 (0.94-1.63) | 0.134 | 1.82 (1.47-2.26) | <0.001 | 3.06 (2.31-4.05) | <.0001 |
| Mechanical ventilation |  |  |  |  |  |  |
| No | Ref |  | Ref |  | Ref |  |
| Yes | 2.26 (1.57-3.27) | <0.001 | 1.29 (1.05-1.58) | 0.017 | 4.61 (3.19-6.68) | <0.001 |
| RRT |  |  |  |  |  |  |
| No | Ref |  | Ref |  | Ref |  |
| Yes | 1.23 (0.88-1.71) | 0.233 | 1.54 (1.17-2.03) | 0.002 | 1.92 (1.30-2.82) | <0.001 |
| Antihypertensive drugs |  |  |  |  |  |  |
| No | Ref |  | Ref |  | Ref |  |
| Yes | 0.29 (0.23-0.37) | <0.001 | 0.42 (0.35-0.51) | <0.001 | 0.66 (0.51-0.86) | 0.002 |
| Number of blood glucose measurements | 0.90 (0.87-0.95) | <0.001 | 0.87 (0.83-0.90) | <0.001 | 0.97 (0.94-1.01) | 0.103 |
| SBP, baseline | 1.01 (1.01-1.01) | 0.038 | 1.01 (1.01-1.01) | 0.001 | 1.01 (1.01-1.01) | <0.001 |
| Glucose, baseline | 1.01 (1.01-1.01) | <0.001 | 1.01 (1.01-1.01) | <0.001 | 1.01 (1.01-1.01) | 0.002 |

RRT, renal replacement therapy; SBP, systolic blood pressure；GV, glycemic variability; SBPV, systolic blood pressure variability; HR, hazard ratio; OR, odd ratio; CI, confidence interval; Ref, reference.
